# Supplementary material for: Portrayal of the color polymorphism in the 5-acetyl-derivative of ROY
Source: Royal Society of Chemistry journal article supplement (doi:10.1039/d1ce01601f), 2022-01-01
Supplement: d1ce01601f1.pdf [file d1ce01601f1.pdf]

- 1 -

Polymorph\_1 P 21/n R = 0.04 : Nov 25 17:45:36 2021

=====

S U P P L E M E N T A R Y M A T E R I A L

=====

B E L O N G I N G T O T H E P A P E R

**Portrayal of the Color Polymorphism in the 5-Acetyl-derivative of ROY**

b y

Bernardo A. Nogueira, Maria Carvalho, José A. Paixão, M. Ermelinda S. Eusébio,  
Susana M. M. Lopes, Teresa M. V. D. Pinho e Melo and Rui Fausto

C o n t e n t s

=====

|                                                                                                                                |        |          |
|--------------------------------------------------------------------------------------------------------------------------------|--------|----------|
| Table S1 - Crystal Data and Details of the Structure Determination<br>for: Polymorph_1                                         | P 21/n | R = 0.04 |
| Table S2 - Final Coordinates and Equivalent Isotropic Displacement<br>Parameters of the non-Hydrogen atoms<br>for: Polymorph_1 | P 21/n | R = 0.04 |
| Table S3 - Hydrogen Atom Positions and Isotropic Displacement<br>Parameters<br>for: Polymorph_1                                | P 21/n | R = 0.04 |
| Table S4 - (An)isotropic Displacement Parameters<br>for: Polymorph_1                                                           | P 21/n | R = 0.04 |
| Table S5 - Bond Distances (Angstrom)<br>for: Polymorph_1                                                                       | P 21/n | R = 0.04 |
| Table S6 - Bond Angles (Degrees)<br>for: Polymorph_1                                                                           | P 21/n | R = 0.04 |
| Table S7 - Torsion Angles (Degrees)<br>for: Polymorph_1                                                                        | P 21/n | R = 0.04 |
| Table S8 - Contact Distances (Angstrom)<br>for: Polymorph_1                                                                    | P 21/n | R = 0.04 |
| Table S9 - Hydrogen Bonds (Angstrom, Deg)<br>for: Polymorph_1                                                                  | P 21/n | R = 0.04 |

Table S1 - Crystal Data and Details of the Structure Determination  
for: Polymorph\_1 P 21/n R = 0.04

Crystal Data

|                          |                    |            |            |
|--------------------------|--------------------|------------|------------|
| Formula                  | C13 H9 N3 O3 S     |            |            |
| Formula Weight           | 287.29             |            |            |
| Crystal System           | monoclinic         |            |            |
| Space group              | P21/n              | (No. 14)   |            |
| a, b, c [Angstrom]       | 5.3354(2)          | 14.2344(4) | 17.1709(6) |
| alpha, beta, gamma [deg] | 90                 | 96.567(2)  | 90         |
| V [Ang**3]               | 1295.51(8)         |            |            |
| Z                        | 4                  |            |            |
| D(calc) [g/cm**3]        | 1.473              |            |            |
| Mu(MoKa) [ /mm ]         | 0.260              |            |            |
| F(000)                   | 592                |            |            |
| Crystal Size [mm]        | 0.22 x 0.25 x 0.32 |            |            |

Data Collection

|                                  |                           |         |       |
|----------------------------------|---------------------------|---------|-------|
| Temperature (K)                  | 295                       |         |       |
| Radiation [Angstrom]             | MoKa                      | 0.71073 |       |
| Theta Min-Max [Deg]              | 3.7, 27.5                 |         |       |
| Dataset                          | -6: 6 ; -18: 18 ; -22: 22 |         |       |
| Tot., Uniq. Data, R(int)         | 122630,                   | 2963,   | 0.048 |
| Observed Data [I > 2.0 sigma(I)] | 2292                      |         |       |

Refinement

|                                                                                          |                      |  |  |
|------------------------------------------------------------------------------------------|----------------------|--|--|
| Nref, Npar                                                                               | 2963, 185            |  |  |
| R, wR2, S                                                                                | 0.0417, 0.1181, 1.06 |  |  |
| $w = \frac{1}{\sigma^2(F_o^2) + (0.0479P)^2 + 0.5373P}$ WHERE $P = (F_o^2 + 2F_c^2) / 3$ |                      |  |  |
| Max. and Av. Shift/Error                                                                 | 0.00, 0.00           |  |  |
| Min. and Max. Resd. Dens. [e/Ang^3]                                                      | -0.19, 0.27          |  |  |

Table S2 - Final Coordinates and Equivalent Isotropic Displacement  
Parameters of the non-Hydrogen atoms  
for: Polymorph\_1 P 21/n R = 0.04

| Atom | x           | y            | z            | U(eq) [Ang^2] |
|------|-------------|--------------|--------------|---------------|
| ---- | ---         | ---          | ---          | -----         |
| S1   | 0.26654 (9) | 0.31751 (4)  | 0.62894 (3)  | 0.0546 (2)    |
| O1   | 0.2270 (3)  | 0.13653 (12) | 0.54883 (11) | 0.0855 (7)    |
| O2   | 0.2298 (5)  | 0.68077 (12) | 0.69017 (13) | 0.0956 (8)    |
| O3   | 0.5820 (5)  | 0.74409 (14) | 0.72987 (15) | 0.1225 (10)   |
| N1   | -0.3475 (4) | 0.58318 (16) | 0.57544 (12) | 0.0775 (8)    |
| N2   | 0.2116 (3)  | 0.49757 (12) | 0.68237 (11) | 0.0582 (6)    |
| N3   | 0.4452 (5)  | 0.67624 (14) | 0.72343 (14) | 0.0794 (8)    |
| C1   | 0.1233 (3)  | 0.42463 (13) | 0.63616 (11) | 0.0489 (6)    |
| C2   | -0.0963 (3) | 0.42995 (14) | 0.58427 (11) | 0.0515 (6)    |
| C3   | -0.1478 (3) | 0.34707 (15) | 0.54116 (11) | 0.0541 (6)    |
| C4   | 0.0278 (3)  | 0.27980 (15) | 0.55846 (11) | 0.0514 (6)    |
| C5   | 0.0441 (4)  | 0.18453 (16) | 0.52840 (12) | 0.0594 (7)    |
| C6   | -0.1718 (4) | 0.14869 (19) | 0.47313 (14) | 0.0746 (8)    |
| C7   | -0.2411 (4) | 0.51390 (17) | 0.57805 (11) | 0.0589 (7)    |
| C8   | 0.4198 (4)  | 0.50297 (14) | 0.73829 (11) | 0.0516 (6)    |
| C9   | 0.5224 (4)  | 0.42408 (15) | 0.77671 (13) | 0.0655 (7)    |
| C10  | 0.7317 (5)  | 0.43047 (18) | 0.83137 (14) | 0.0782 (9)    |
| C11  | 0.8461 (5)  | 0.5145 (2)   | 0.84986 (16) | 0.0808 (10)   |
| C12  | 0.7483 (5)  | 0.59369 (19) | 0.81343 (15) | 0.0746 (9)    |
| C13  | 0.5372 (4)  | 0.58883 (14) | 0.75890 (12) | 0.0589 (7)    |

U(eq) = 1/3 of the trace of the orthogonalized U Tensor

Table S3 - Hydrogen Atom Positions and Isotropic Displacement  
Parameters  
for: Polymorph\_1      P 21/n      R = 0.04

| Atom | x        | y        | z          | U(iso) [Ang^2] |
|------|----------|----------|------------|----------------|
| ---- | ---      | ---      | ---        | -----          |
| H2   | 0.144(5) | 0.549(2) | 0.6757(16) | 0.0870         |
| H3   | -0.28856 | 0.33932  | 0.50445    | 0.0650         |
| H6A  | -0.13972 | 0.08482  | 0.45933    | 0.1120         |
| H6B  | -0.19032 | 0.18674  | 0.42666    | 0.1120         |
| H6C  | -0.32404 | 0.15154  | 0.49793    | 0.1120         |
| H9   | 0.44865  | 0.36571  | 0.76544    | 0.0790         |
| H10  | 0.79652  | 0.37621  | 0.85625    | 0.0940         |
| H11  | 0.98818  | 0.51773  | 0.88660    | 0.0970         |
| H12  | 0.82433  | 0.65149  | 0.82541    | 0.0900         |

=====  
The Temperature Factor has the Form of  $\text{Exp}(-T)$  Where  
 $T = 8 * (\text{Pi} ** 2) * U * (\text{Sin}(\text{Theta}) / \text{Lambda}) ** 2$  for Isotropic Atoms

Table S4 - (An)isotropic Displacement Parameters  
for: Polymorph\_1 P 21/n R = 0.04

| Atom | U(1,1) or U | U(2,2)      | U(3,3)      | U(2,3)       | U(1,3)       | U(1,2)       |
|------|-------------|-------------|-------------|--------------|--------------|--------------|
| ---- | -----       | -----       | -----       | -----        | -----        | -----        |
| S1   | 0.0420 (3)  | 0.0585 (3)  | 0.0591 (3)  | 0.0035 (2)   | -0.0117 (2)  | 0.0035 (2)   |
| O1   | 0.0699 (10) | 0.0791 (11) | 0.0993 (13) | -0.0135 (10) | -0.0252 (9)  | 0.0208 (9)   |
| O2   | 0.1230 (17) | 0.0575 (10) | 0.1032 (15) | 0.0050 (9)   | 0.0000 (13)  | 0.0209 (11)  |
| O3   | 0.166 (2)   | 0.0610 (11) | 0.143 (2)   | 0.0001 (12)  | 0.0283 (17)  | -0.0357 (13) |
| N1   | 0.0721 (12) | 0.0905 (15) | 0.0669 (12) | 0.0008 (10)  | -0.0052 (9)  | 0.0325 (11)  |
| N2   | 0.0573 (10) | 0.0508 (9)  | 0.0636 (10) | 0.0059 (8)   | -0.0061 (8)  | 0.0050 (8)   |
| N3   | 0.1103 (18) | 0.0513 (11) | 0.0794 (14) | -0.0054 (10) | 0.0226 (13)  | -0.0043 (12) |
| C1   | 0.0427 (9)  | 0.0554 (11) | 0.0474 (9)  | 0.0083 (8)   | 0.0005 (7)   | -0.0003 (8)  |
| C2   | 0.0405 (9)  | 0.0661 (12) | 0.0472 (10) | 0.0113 (9)   | 0.0022 (7)   | 0.0096 (8)   |
| C3   | 0.0390 (9)  | 0.0761 (13) | 0.0453 (10) | 0.0027 (9)   | -0.0038 (7)  | 0.0042 (9)   |
| C4   | 0.0381 (9)  | 0.0671 (12) | 0.0467 (10) | 0.0045 (9)   | -0.0045 (7)  | 0.0013 (8)   |
| C5   | 0.0527 (11) | 0.0688 (13) | 0.0541 (11) | -0.0010 (10) | -0.0047 (9)  | 0.0041 (10)  |
| C6   | 0.0672 (14) | 0.0835 (16) | 0.0680 (14) | -0.0128 (12) | -0.0148 (11) | 0.0003 (12)  |
| C7   | 0.0484 (10) | 0.0798 (14) | 0.0468 (10) | 0.0043 (10)  | -0.0024 (8)  | 0.0137 (10)  |
| C8   | 0.0504 (10) | 0.0529 (10) | 0.0509 (10) | -0.0019 (8)  | 0.0030 (8)   | -0.0002 (8)  |
| C9   | 0.0783 (14) | 0.0543 (12) | 0.0583 (12) | -0.0021 (9)  | -0.0167 (10) | 0.0002 (10)  |
| C10  | 0.0872 (17) | 0.0742 (15) | 0.0662 (14) | -0.0146 (12) | -0.0217 (12) | 0.0190 (13)  |
| C11  | 0.0654 (14) | 0.0923 (19) | 0.0790 (16) | -0.0284 (14) | -0.0159 (12) | 0.0044 (13)  |
| C12  | 0.0709 (14) | 0.0785 (16) | 0.0749 (15) | -0.0269 (13) | 0.0101 (12)  | -0.0196 (12) |
| C13  | 0.0662 (12) | 0.0535 (11) | 0.0584 (11) | -0.0058 (9)  | 0.0137 (10)  | -0.0032 (9)  |

=====

The Temperature Factor has the Form of  $\text{Exp}(-T)$  Where  
 $T = 8 * (\text{Pi}^{**2}) * U * (\text{Sin}(\text{Theta}) / \text{Lambda})^{**2}$  for Isotropic Atoms  
 $T = 2 * (\text{Pi}^{**2}) * \text{Sum}_{ij} (h(i) * h(j) * U(i,j) * \text{Astar}(i) * \text{Astar}(j))$ , for  
Anisotropic Atoms. Astar(i) are Reciprocal Axial Lengths and  
h(i) are the Reflection Indices.

Table S5 - Bond Distances (Angstrom)  
for: Polymorph\_1 P 21/n R = 0.04

|    |      |             |     |      |           |
|----|------|-------------|-----|------|-----------|
| S1 | -C1  | 1.7164 (19) | C5  | -C6  | 1.496 (3) |
| S1 | -C4  | 1.7386 (19) | C8  | -C13 | 1.400 (3) |
| O1 | -C5  | 1.210 (3)   | C8  | -C9  | 1.383 (3) |
| O2 | -N3  | 1.225 (4)   | C9  | -C10 | 1.377 (3) |
| O3 | -N3  | 1.208 (3)   | C10 | -C11 | 1.364 (4) |
| N1 | -C7  | 1.136 (3)   | C11 | -C12 | 1.364 (4) |
| N2 | -C1  | 1.358 (3)   | C12 | -C13 | 1.382 (3) |
| N2 | -C8  | 1.385 (3)   | C3  | -H3  | 0.9300    |
| N3 | -C13 | 1.446 (3)   | C6  | -H6A | 0.9600    |
| C1 | -C2  | 1.391 (2)   | C6  | -H6B | 0.9600    |
| C2 | -C3  | 1.403 (3)   | C6  | -H6C | 0.9600    |
| C2 | -C7  | 1.420 (3)   | C9  | -H9  | 0.9300    |
| N2 | -H2  | 0.82 (3)    | C10 | -H10 | 0.9300    |
| C3 | -C4  | 1.349 (3)   | C11 | -H11 | 0.9300    |
| C4 | -C5  | 1.457 (3)   | C12 | -H12 | 0.9300    |

Table S6 - Bond Angles (Degrees)  
for: Polymorph\_1 P 21/n R = 0.04

|    |     |      |            |     |      |      |            |
|----|-----|------|------------|-----|------|------|------------|
| C1 | -S1 | -C4  | 91.59(9)   | C8  | -C9  | -C10 | 121.2(2)   |
| C1 | -N2 | -C8  | 130.15(17) | C9  | -C10 | -C11 | 121.5(2)   |
| O2 | -N3 | -O3  | 121.7(2)   | C10 | -C11 | -C12 | 118.7(2)   |
| O2 | -N3 | -C13 | 119.8(2)   | C11 | -C12 | -C13 | 120.6(2)   |
| O3 | -N3 | -C13 | 118.5(2)   | C8  | -C13 | -C12 | 121.4(2)   |
| S1 | -C1 | -N2  | 126.43(14) | N3  | -C13 | -C8  | 121.60(19) |
| S1 | -C1 | -C2  | 110.59(14) | N3  | -C13 | -C12 | 117.0(2)   |
| N2 | -C1 | -C2  | 122.91(17) | C2  | -C3  | -H3  | 123.00     |
| C1 | -C2 | -C3  | 113.08(17) | C4  | -C3  | -H3  | 123.00     |
| C1 | -C2 | -C7  | 120.35(18) | C5  | -C6  | -H6A | 109.00     |
| C3 | -C2 | -C7  | 126.56(17) | C5  | -C6  | -H6B | 109.00     |
| C1 | -N2 | -H2  | 119.0(19)  | C5  | -C6  | -H6C | 109.00     |
| C8 | -N2 | -H2  | 110.7(19)  | H6A | -C6  | -H6B | 109.00     |
| C2 | -C3 | -C4  | 113.05(16) | H6A | -C6  | -H6C | 109.00     |
| S1 | -C4 | -C5  | 117.73(14) | H6B | -C6  | -H6C | 109.00     |
| S1 | -C4 | -C3  | 111.67(16) | C8  | -C9  | -H9  | 119.00     |
| C3 | -C4 | -C5  | 130.60(18) | C10 | -C9  | -H9  | 119.00     |
| C4 | -C5 | -C6  | 117.99(19) | C9  | -C10 | -H10 | 119.00     |
| O1 | -C5 | -C6  | 121.9(2)   | C11 | -C10 | -H10 | 119.00     |
| O1 | -C5 | -C4  | 120.11(19) | C10 | -C11 | -H11 | 121.00     |
| N1 | -C7 | -C2  | 176.6(2)   | C12 | -C11 | -H11 | 121.00     |
| C9 | -C8 | -C13 | 116.54(19) | C11 | -C12 | -H12 | 120.00     |
| N2 | -C8 | -C9  | 121.87(19) | C13 | -C12 | -H12 | 120.00     |
| N2 | -C8 | -C13 | 121.59(18) |     |      |      |            |

Table S7 - Torsion Angles (Degrees)  
for: Polymorph\_1 P 21/n R = 0.04

|     |     |      |      |             |
|-----|-----|------|------|-------------|
| C4  | -S1 | -C1  | -N2  | -178.33(18) |
| C4  | -S1 | -C1  | -C2  | -1.38(14)   |
| C1  | -S1 | -C4  | -C3  | 1.05(15)    |
| C1  | -S1 | -C4  | -C5  | -178.53(16) |
| C8  | -N2 | -C1  | -S1  | -5.7(3)     |
| C8  | -N2 | -C1  | -C2  | 177.67(19)  |
| C1  | -N2 | -C8  | -C9  | -24.6(3)    |
| C1  | -N2 | -C8  | -C13 | 155.5(2)    |
| O2  | -N3 | -C13 | -C8  | 18.6(4)     |
| O2  | -N3 | -C13 | -C12 | -162.2(2)   |
| O3  | -N3 | -C13 | -C8  | -163.9(2)   |
| O3  | -N3 | -C13 | -C12 | 15.4(3)     |
| S1  | -C1 | -C2  | -C3  | 1.4(2)      |
| S1  | -C1 | -C2  | -C7  | -177.61(15) |
| N2  | -C1 | -C2  | -C3  | 178.48(17)  |
| N2  | -C1 | -C2  | -C7  | -0.5(3)     |
| C1  | -C2 | -C3  | -C4  | -0.6(2)     |
| C7  | -C2 | -C3  | -C4  | 178.31(18)  |
| C2  | -C3 | -C4  | -S1  | -0.4(2)     |
| C2  | -C3 | -C4  | -C5  | 179.07(19)  |
| S1  | -C4 | -C5  | -O1  | -4.6(3)     |
| S1  | -C4 | -C5  | -C6  | 174.67(15)  |
| C3  | -C4 | -C5  | -O1  | 176.0(2)    |
| C3  | -C4 | -C5  | -C6  | -4.8(3)     |
| N2  | -C8 | -C9  | -C10 | 179.1(2)    |
| C13 | -C8 | -C9  | -C10 | -1.0(3)     |
| N2  | -C8 | -C13 | -N3  | 0.7(3)      |
| N2  | -C8 | -C13 | -C12 | -178.5(2)   |



Table S7 - Torsion Angles (Degrees) (continued)  
for: Polymorph\_1 P 21/n R = 0.04

|     |      |      |      |           |
|-----|------|------|------|-----------|
| C9  | -C8  | -C13 | -N3  | -179.3(2) |
| C9  | -C8  | -C13 | -C12 | 1.6(3)    |
| C8  | -C9  | -C10 | -C11 | 0.0(4)    |
| C9  | -C10 | -C11 | -C12 | 0.5(4)    |
| C10 | -C11 | -C12 | -C13 | 0.1(4)    |
| C11 | -C12 | -C13 | -N3  | 179.7(2)  |
| C11 | -C12 | -C13 | -C8  | -1.1(4)   |

Table S8 - Contact Distances (Angstrom)  
for: Polymorph\_1 P 21/n R = 0.04

|    |        |             |    |        |             |
|----|--------|-------------|----|--------|-------------|
| S1 | .O1    | 2.9166 (18) | N2 | .N3    | 2.884 (3)   |
| S1 | .C3    | 2.5639 (18) | O3 | .H12   | 2.3700      |
| S1 | .C3_a  | 3.6456 (17) | O3 | .H10_f | 2.5200      |
| S1 | .C8    | 3.288 (2)   | N3 | .N2    | 2.884 (3)   |
| S1 | .C9    | 3.132 (2)   | N3 | .N1_a  | 3.175 (3)   |
| S1 | .O3_b  | 3.385 (3)   | N3 | .S1_e  | 3.522 (2)   |
| S1 | .N3_b  | 3.522 (2)   | C1 | .C3    | 2.331 (3)   |
| S1 | .H9    | 2.5300      | C1 | .N1    | 3.448 (3)   |
| O1 | .S1    | 2.9166 (18) | N1 | .H3_h  | 2.5000      |
| O1 | .C11_c | 3.213 (3)   | C1 | .C9    | 3.030 (3)   |
| O2 | .N2    | 2.612 (2)   | N2 | .H9    | 2.6000      |
| O2 | .C8    | 2.815 (3)   | C2 | .C4    | 2.296 (3)   |
| O3 | .S1_e  | 3.385 (3)   | C2 | .C7_d  | 3.577 (3)   |
| O3 | .C10_f | 3.061 (3)   | N3 | .H12   | 2.5400      |
| O3 | .C12   | 2.672 (3)   | N3 | .H2    | 2.50 (3)    |
| O3 | .C9_f  | 3.330 (3)   | C3 | .N1_h  | 3.319 (3)   |
| O1 | .H6A   | 2.4600      | C3 | .C6    | 3.053 (3)   |
| N1 | .N3_g  | 3.175 (3)   | C3 | .S1_g  | 3.6456 (17) |
| N1 | .C8_g  | 3.385 (3)   | C3 | .S1    | 2.5639 (18) |
| O1 | .H11_c | 2.4500      | C4 | .C2    | 2.296 (3)   |
| O1 | .H6C_a | 2.6500      | C5 | .C12_b | 3.529 (3)   |
| N1 | .C1    | 3.448 (3)   | C6 | .C3    | 3.053 (3)   |
| N1 | .C13_g | 3.279 (3)   | C7 | .C8_g  | 3.465 (3)   |
| N1 | .C3_h  | 3.319 (3)   | C7 | .N2    | 2.847 (3)   |
| N2 | .O2    | 2.612 (2)   | C7 | .C2_d  | 3.577 (3)   |
| N2 | .C7    | 2.847 (3)   | C8 | .C11   | 2.806 (3)   |
| O2 | .H6B_d | 2.7400      | C8 | .C7_a  | 3.465 (3)   |
| O2 | .H2    | 1.94 (3)    | C8 | .O2    | 2.815 (3)   |

Table S8 - Contact Distances (Angstrom) (continued)  
 for: Polymorph\_1 P 21/n R = 0.04

|     |       |           |     |       |          |
|-----|-------|-----------|-----|-------|----------|
| C8  | .S1   | 3.288 (2) | H2  | .N3   | 2.50 (3) |
| C8  | .N1_a | 3.385 (3) | H2  | .C2   | 2.55 (3) |
| C9  | .C1   | 3.030 (3) | H2  | .C7   | 2.55 (3) |
| C9  | .S1   | 3.132 (2) | H2  | .C9   | 3.07 (3) |
| C9  | .C12  | 2.740 (3) | H2  | .C13  | 2.47 (3) |
| C9  | .O3_c | 3.330 (3) | H3  | .C5   | 2.8300   |
| C10 | .C13  | 2.722 (3) | H3  | .C6   | 2.8500   |
| C10 | .O3_c | 3.061 (3) | H3  | .C7   | 2.7900   |
| C11 | .C8   | 2.806 (3) | H3  | .N1_h | 2.5000   |
| C11 | .O1_f | 3.213 (3) | H6A | .O1   | 2.4600   |
| C12 | .C9   | 2.740 (3) | H6B | .C3   | 3.0000   |
| C12 | .C5_e | 3.529 (3) | H6B | .C4   | 2.7600   |
| C12 | .O3   | 2.672 (3) | H6B | .O2_d | 2.7400   |
| C13 | .N1_a | 3.279 (3) | H6C | .O1_g | 2.6500   |
| C13 | .C10  | 2.722 (3) | H6C | .C3   | 3.0000   |
| C1  | .H9   | 2.7900    | H6C | .C4   | 2.7400   |
| C2  | .H2   | 2.55 (3)  | H9  | .S1   | 2.5300   |
| C3  | .H6B  | 3.0000    | H9  | .N2   | 2.6000   |
| C3  | .H6C  | 3.0000    | H9  | .C1   | 2.7900   |
| C4  | .H6B  | 2.7600    | H9  | .H10  | 2.2900   |
| C4  | .H6C  | 2.7400    | H10 | .H9   | 2.2900   |
| C5  | .H3   | 2.8300    | H10 | .H11  | 2.2900   |
| C6  | .H3   | 2.8500    | H10 | .O3_c | 2.5200   |
| C7  | .H2   | 2.55 (3)  | H11 | .H10  | 2.2900   |
| C7  | .H3   | 2.7900    | H11 | .H12  | 2.3000   |
| C9  | .H2   | 3.07 (3)  | H11 | .O1_f | 2.4500   |
| C13 | .H2   | 2.47 (3)  | H12 | .O3   | 2.3700   |
| H2  | .O2   | 1.94 (3)  | H12 | .N3   | 2.5400   |

Table S8 - Contact Distances (Angstrom) (continued)  
for: Polymorph\_1 P 21/n R = 0.04

|     |      |        |
|-----|------|--------|
| H12 | .H11 | 2.3000 |
|-----|------|--------|

Table S9 - Hydrogen Bonds (Angstrom, Deg)  
for: Polymorph\_1 P 21/n R = 0.04

|     |    |     |    |    |          |          |           |         |       |
|-----|----|-----|----|----|----------|----------|-----------|---------|-------|
| N2  | -- | H2  | .. | O2 | 0.82 (3) | 1.94 (3) | 2.612 (2) | 139 (3) | .     |
| N2  | -- | H2  | .. | N3 | 0.82 (3) | 2.50 (3) | 2.884 (3) | 110 (2) | .     |
| C3  | -- | H3  | .. | N1 | 0.9300   | 2.5000   | 3.319 (3) | 147.00  | 3_466 |
| C9  | -- | H9  | .. | S1 | 0.9300   | 2.5300   | 3.132 (2) | 123.00  | .     |
| C10 | -- | H10 | .. | O3 | 0.9300   | 2.5200   | 3.061 (3) | 117.00  | 2_646 |
| C11 | -- | H11 | .. | O1 | 0.9300   | 2.4500   | 3.213 (3) | 139.00  | 2_656 |

Translation of Symmetry Code to Equiv.Pos

a =[ 1655.00] = [ 1\_655] = 1+x,y,z  
b =[ 2546.00] = [ 2\_546] = 1/2-x,-1/2+y,3/2-z  
c =[ 2646.00] = [ 2\_646] = 3/2-x,-1/2+y,3/2-z  
d =[ 3566.00] = [ 3\_566] = -x,1-y,1-z  
e =[ 2556.00] = [ 2\_556] = 1/2-x,1/2+y,3/2-z  
f =[ 2656.00] = [ 2\_656] = 3/2-x,1/2+y,3/2-z  
g =[ 1455.00] = [ 1\_455] = -1+x,y,z  
h =[ 3466.00] = [ 3\_466] = -1-x,1-y,1-z
