# Supplementary material for: Portrayal of the color polymorphism in the 5-acetyl-derivative of ROY
Source: Royal Society of Chemistry journal article supplement (doi:10.1039/d1ce01601f), 2022-01-01
Supplement: d1ce01601f2.pdf [file d1ce01601f2.pdf]

- 1 -

Polymorph\_2 P 21/c R = 0.06 : Nov 25 17:44:56 2021

=====

S U P P L E M E N T A R Y M A T E R I A L

=====

B E L O N G I N G T O T H E P A P E R

**Portrayal of the Color Polymorphism in the 5-Acetyl-derivative of ROY**

b y

Bernardo A. Nogueira, Maria Carvalho, José A. Paixão, M. Ermelinda S. Eusébio,  
Susana M. M. Lopes, Teresa M. V. D. Pinho e Melo and Rui Fausto

C o n t e n t s

=====

|                                                                                                                                                |
|------------------------------------------------------------------------------------------------------------------------------------------------|
| Table S1 - Crystal Data and Details of the Structure Determination<br>for: Polymorph_2 P 21/c R = 0.06                                         |
| Table S2 - Final Coordinates and Equivalent Isotropic Displacement<br>Parameters of the non-Hydrogen atoms<br>for: Polymorph_2 P 21/c R = 0.06 |
| Table S3 - Hydrogen Atom Positions and Isotropic Displacement<br>Parameters<br>for: Polymorph_2 P 21/c R = 0.06                                |
| Table S4 - (An)isotropic Displacement Parameters<br>for: Polymorph_2 P 21/c R = 0.06                                                           |
| Table S5 - Bond Distances (Angstrom)<br>for: Polymorph_2 P 21/c R = 0.06                                                                       |
| Table S6 - Bond Angles (Degrees)<br>for: Polymorph_2 P 21/c R = 0.06                                                                           |
| Table S7 - Torsion Angles (Degrees)<br>for: Polymorph_2 P 21/c R = 0.06                                                                        |
| Table S8 - Contact Distances (Angstrom)<br>for: Polymorph_2 P 21/c R = 0.06                                                                    |
| Table S9 - Hydrogen Bonds (Angstrom, Deg)<br>for: Polymorph_2 P 21/c R = 0.06                                                                  |

Table S1 - Crystal Data and Details of the Structure Determination  
for: Polymorph\_2 P 21/c R = 0.06

Crystal Data

|                          |                    |             |           |
|--------------------------|--------------------|-------------|-----------|
| Formula                  | C13 H9 N3 O3 S     |             |           |
| Formula Weight           | 287.29             |             |           |
| Crystal System           | monoclinic         |             |           |
| Space group              | P21/c              | (No. 14)    |           |
| a, b, c [Angstrom]       | 25.451(3)          | 14.4966(14) | 7.1113(7) |
| alpha, beta, gamma [deg] | 90                 | 95.795(6)   | 90        |
| V [Ang**3]               | 2610.3(5)          |             |           |
| Z                        | 8                  |             |           |
| D(calc) [g/cm**3]        | 1.462              |             |           |
| Mu(MoKa) [ /mm ]         | 0.258              |             |           |
| F(000)                   | 1184               |             |           |
| Crystal Size [mm]        | 0.12 x 0.30 x 0.50 |             |           |

Data Collection

|                                  |                           |         |       |
|----------------------------------|---------------------------|---------|-------|
| Temperature (K)                  | 296                       |         |       |
| Radiation [Angstrom]             | MoKa                      | 0.71073 |       |
| Theta Min-Max [Deg]              | 2.4, 25.0                 |         |       |
| Dataset                          | -30: 30 ; -17: 17 ; -8: 8 |         |       |
| Tot., Uniq. Data, R(int)         | 207226,                   | 4598,   | 0.116 |
| Observed Data [I > 2.0 sigma(I)] | 3090                      |         |       |

Refinement

|                                                                                          |                      |  |  |
|------------------------------------------------------------------------------------------|----------------------|--|--|
| Nref, Npar                                                                               | 4598, 369            |  |  |
| R, wR2, S                                                                                | 0.0584, 0.1582, 1.10 |  |  |
| $w = \frac{1}{\sigma^2(F_o^2) + (0.0545P)^2 + 2.8905P}$ WHERE $P = (F_o^2 + 2F_c^2) / 3$ |                      |  |  |
| Max. and Av. Shift/Error                                                                 | 0.00, 0.00           |  |  |
| Min. and Max. Resd. Dens. [e/Ang^3]                                                      | -0.26, 0.37          |  |  |

Table S2 - Final Coordinates and Equivalent Isotropic Displacement  
 Parameters of the non-Hydrogen atoms  
 for: Polymorph\_2 P 21/c R = 0.06

| Atom | x             | y            | z            | U(eq) [Ang <sup>2</sup> ] |
|------|---------------|--------------|--------------|---------------------------|
| ---- | ---           | ---          | ---          | -----                     |
| S1   | 0.28073 (4)   | 0.23419 (6)  | 0.46997 (14) | 0.0504 (3)                |
| S1'  | 0.22111 (4)   | 0.54839 (6)  | 0.55678 (15) | 0.0531 (3)                |
| O1   | 0.17683 (12)  | 0.2918 (2)   | 0.5654 (5)   | 0.0850 (14)               |
| O2   | 0.44633 (11)  | 0.03151 (19) | 0.3209 (5)   | 0.0837 (13)               |
| O3   | 0.52147 (12)  | 0.0849 (2)   | 0.2718 (6)   | 0.1015 (16)               |
| N1   | 0.33962 (16)  | -0.0984 (3)  | 0.4818 (7)   | 0.0866 (18)               |
| N2   | 0.37014 (12)  | 0.1403 (2)   | 0.3918 (5)   | 0.0489 (10)               |
| N3   | 0.47593 (13)  | 0.0970 (2)   | 0.3038 (5)   | 0.0611 (12)               |
| C1   | 0.32058 (13)  | 0.1404 (2)   | 0.4470 (5)   | 0.0423 (11)               |
| O1'  | 0.32773 (12)  | 0.4873 (2)   | 0.4995 (5)   | 0.0900 (14)               |
| C2   | 0.29533 (14)  | 0.0595 (2)   | 0.4902 (5)   | 0.0508 (12)               |
| O2'  | 0.06262 (12)  | 0.7555 (2)   | 0.7402 (6)   | 0.0910 (13)               |
| C3   | 0.24369 (15)  | 0.0749 (3)   | 0.5386 (5)   | 0.0568 (14)               |
| O3'  | -0.00855 (14) | 0.7023 (3)   | 0.8329 (7)   | 0.1259 (19)               |
| C4   | 0.23038 (14)  | 0.1647 (3)   | 0.5339 (5)   | 0.0511 (12)               |
| C5   | 0.18106 (15)  | 0.2083 (3)   | 0.5716 (6)   | 0.0600 (16)               |
| C6   | 0.13698 (16)  | 0.1467 (4)   | 0.6238 (7)   | 0.086 (2)                 |
| C7   | 0.31987 (16)  | -0.0286 (3)  | 0.4854 (6)   | 0.0591 (14)               |
| C8   | 0.40535 (13)  | 0.2104 (2)   | 0.3636 (5)   | 0.0422 (11)               |
| C9   | 0.39223 (14)  | 0.3036 (2)   | 0.3754 (5)   | 0.0481 (12)               |
| C10  | 0.42808 (16)  | 0.3712 (3)   | 0.3435 (5)   | 0.0572 (16)               |
| C11  | 0.47814 (16)  | 0.3497 (3)   | 0.3013 (6)   | 0.0613 (16)               |

Table S2 - Final Coordinates and Equivalent Isotropic Displacement  
Parameters of the non-Hydrogen atoms (continued)  
for: Polymorph\_2 P 21/c R = 0.06

| Atom<br>---- | x<br>---     | y<br>---   | z<br>---   | U(eq) [Ang^2]<br>----- |
|--------------|--------------|------------|------------|------------------------|
| C12          | 0.49263 (15) | 0.2600 (3) | 0.2910 (6) | 0.0573 (16)            |
| C13          | 0.45695 (13) | 0.1904 (2) | 0.3209 (5) | 0.0464 (12)            |
| N1'          | 0.16577 (15) | 0.8814 (2) | 0.5760 (6) | 0.0756 (16)            |
| N2'          | 0.13069 (12) | 0.6453 (2) | 0.6115 (5) | 0.0509 (10)            |
| N3'          | 0.03323 (13) | 0.6901 (2) | 0.7673 (6) | 0.0735 (14)            |
| C1'          | 0.18208 (12) | 0.6437 (2) | 0.5748 (5) | 0.0401 (11)            |
| C2'          | 0.20986 (13) | 0.7238 (2) | 0.5519 (5) | 0.0453 (11)            |
| C3'          | 0.26276 (14) | 0.7080 (3) | 0.5205 (5) | 0.0517 (12)            |
| C4'          | 0.27500 (14) | 0.6176 (3) | 0.5184 (5) | 0.0526 (14)            |
| C5'          | 0.32506 (16) | 0.5709 (3) | 0.4996 (6) | 0.0665 (16)            |
| C6'          | 0.37239 (16) | 0.6318 (4) | 0.4814 (9) | 0.093 (2)              |
| C7'          | 0.18644 (15) | 0.8124 (3) | 0.5642 (5) | 0.0526 (12)            |
| C8'          | 0.09594 (13) | 0.5762 (2) | 0.6508 (5) | 0.0447 (11)            |
| C9'          | 0.10573 (15) | 0.4835 (2) | 0.6168 (6) | 0.0554 (14)            |
| C10'         | 0.07015 (16) | 0.4167 (3) | 0.6540 (6) | 0.0656 (16)            |
| C11'         | 0.02364 (16) | 0.4385 (3) | 0.7268 (6) | 0.0656 (16)            |
| C12'         | 0.01296 (14) | 0.5279 (3) | 0.7617 (6) | 0.0592 (16)            |
| C13'         | 0.04813 (14) | 0.5967 (2) | 0.7248 (5) | 0.0506 (12)            |

U(eq) = 1/3 of the trace of the orthogonalized U Tensor

Table S3 - Hydrogen Atom Positions and Isotropic Displacement Parameters  
for: Polymorph\_2 P 21/c R = 0.06

| Atom | x          | y        | z        | U(iso) [Ang^2] |
|------|------------|----------|----------|----------------|
| ---- | ---        | ---      | ---      | -----          |
| H2   | 0.3844(15) | 0.090(3) | 0.378(5) | 0.0590         |
| H3   | 0.22125    | 0.02805  | 0.57026  | 0.0680         |
| H6A  | 0.10372    | 0.17088  | 0.56966  | 0.1290         |
| H6B  | 0.13737    | 0.14448  | 0.75886  | 0.1290         |
| H6C  | 0.14181    | 0.08570  | 0.57610  | 0.1290         |
| H9   | 0.35875    | 0.32014  | 0.40519  | 0.0580         |
| H10  | 0.41828    | 0.43279  | 0.35068  | 0.0680         |
| H11  | 0.50190    | 0.39637  | 0.27993  | 0.0740         |
| H12  | 0.52659    | 0.24510  | 0.26379  | 0.0690         |
| H6A' | 0.38462    | 0.65683  | 0.60295  | 0.1390         |
| H2'  | 0.1207(15) | 0.694(3) | 0.636(6) | 0.0610         |
| H6B' | 0.36260    | 0.68117  | 0.39502  | 0.1390         |
| H3'  | 0.28673    | 0.75486  | 0.50304  | 0.0620         |
| H6C' | 0.40005    | 0.59602  | 0.43470  | 0.1390         |
| H9'  | 0.13690    | 0.46665  | 0.56803  | 0.0670         |
| H10' | 0.07759    | 0.35535  | 0.62958  | 0.0780         |
| H11' | -0.00010   | 0.39238  | 0.75173  | 0.0790         |
| H12' | -0.01837   | 0.54326  | 0.81093  | 0.0710         |

=====

The Temperature Factor has the Form of  $\text{Exp}(-T)$  Where  
 $T = 8 * (\text{Pi} ** 2) * U * (\text{Sin}(\text{Theta}) / \text{Lambda}) ** 2$  for Isotropic Atoms

Table S4 - (An)isotropic Displacement Parameters  
for: Polymorph\_2 P 21/c R = 0.06

| Atom | U(1,1) or U | U(2,2)      | U(3,3)      | U(2,3)       | U(1,3)      | U(1,2)       |
|------|-------------|-------------|-------------|--------------|-------------|--------------|
| ---- | -----       | -----       | -----       | -----        | -----       | -----        |
| S1   | 0.0477 (5)  | 0.0452 (5)  | 0.0603 (6)  | 0.0010 (4)   | 0.0147 (4)  | 0.0028 (4)   |
| S1'  | 0.0428 (5)  | 0.0405 (5)  | 0.0776 (7)  | 0.0013 (5)   | 0.0140 (4)  | 0.0014 (4)   |
| O1   | 0.067 (2)   | 0.074 (2)   | 0.118 (3)   | 0.007 (2)    | 0.0294 (18) | 0.0187 (17)  |
| O2   | 0.0617 (18) | 0.0427 (17) | 0.152 (3)   | -0.0109 (18) | 0.0368 (19) | 0.0018 (14)  |
| O3   | 0.060 (2)   | 0.072 (2)   | 0.180 (4)   | 0.015 (2)    | 0.049 (2)   | 0.0169 (17)  |
| N1   | 0.085 (3)   | 0.047 (2)   | 0.131 (4)   | 0.003 (2)    | 0.027 (3)   | 0.002 (2)    |
| N2   | 0.0449 (17) | 0.0334 (16) | 0.070 (2)   | -0.0041 (15) | 0.0142 (15) | 0.0001 (13)  |
| N3   | 0.052 (2)   | 0.054 (2)   | 0.080 (2)   | 0.0003 (17)  | 0.0203 (17) | 0.0073 (17)  |
| C1   | 0.0463 (19) | 0.0383 (19) | 0.0427 (19) | -0.0002 (15) | 0.0065 (15) | -0.0027 (16) |
| O1'  | 0.0604 (19) | 0.065 (2)   | 0.149 (3)   | -0.010 (2)   | 0.032 (2)   | 0.0068 (16)  |
| C2   | 0.050 (2)   | 0.042 (2)   | 0.061 (2)   | -0.0038 (17) | 0.0080 (18) | -0.0066 (17) |
| O2'  | 0.0657 (19) | 0.0450 (17) | 0.169 (3)   | -0.0114 (19) | 0.045 (2)   | 0.0032 (15)  |
| C3   | 0.052 (2)   | 0.056 (2)   | 0.064 (3)   | -0.0044 (19) | 0.0134 (19) | -0.0128 (19) |
| O3'  | 0.079 (2)   | 0.075 (2)   | 0.238 (5)   | -0.019 (3)   | 0.086 (3)   | 0.0070 (19)  |
| C4   | 0.043 (2)   | 0.059 (2)   | 0.052 (2)   | -0.0027 (18) | 0.0078 (17) | -0.0053 (17) |
| C5   | 0.044 (2)   | 0.068 (3)   | 0.069 (3)   | -0.006 (2)   | 0.0104 (19) | 0.005 (2)    |
| C6   | 0.050 (3)   | 0.103 (4)   | 0.110 (4)   | -0.023 (3)   | 0.029 (3)   | -0.007 (2)   |
| C7   | 0.057 (2)   | 0.039 (2)   | 0.083 (3)   | 0.000 (2)    | 0.016 (2)   | -0.0095 (19) |
| C8   | 0.0446 (19) | 0.0375 (19) | 0.045 (2)   | -0.0014 (15) | 0.0069 (15) | -0.0037 (15) |
| C9   | 0.049 (2)   | 0.042 (2)   | 0.054 (2)   | -0.0040 (17) | 0.0087 (17) | -0.0041 (17) |
| C10  | 0.066 (3)   | 0.039 (2)   | 0.067 (3)   | 0.0008 (18)  | 0.009 (2)   | -0.0058 (19) |
| C11  | 0.057 (2)   | 0.053 (3)   | 0.075 (3)   | 0.003 (2)    | 0.012 (2)   | -0.017 (2)   |

Table S4 - (An)isotropic Displacement Parameters (continued)  
for: Polymorph\_2 P 21/c R = 0.06

| Atom | U(1,1) or U | U(2,2)     | U(3,3)     | U(2,3)      | U(1,3)     | U(1,2)      |
|------|-------------|------------|------------|-------------|------------|-------------|
| C12  | 0.045(2)    | 0.060(3)   | 0.068(3)   | 0.003(2)    | 0.0116(18) | -0.0068(18) |
| C13  | 0.046(2)    | 0.042(2)   | 0.052(2)   | -0.0008(16) | 0.0094(16) | 0.0028(16)  |
| N1'  | 0.084(3)    | 0.042(2)   | 0.100(3)   | -0.0002(19) | 0.005(2)   | 0.0061(19)  |
| N2'  | 0.0428(17)  | 0.0346(16) | 0.077(2)   | 0.0005(16)  | 0.0149(15) | 0.0010(14)  |
| N3'  | 0.051(2)    | 0.052(2)   | 0.122(3)   | -0.007(2)   | 0.031(2)   | 0.0052(17)  |
| C1'  | 0.0366(17)  | 0.0385(19) | 0.0459(19) | 0.0006(15)  | 0.0071(15) | -0.0010(15) |
| C2'  | 0.047(2)    | 0.0384(19) | 0.051(2)   | 0.0010(16)  | 0.0077(16) | -0.0023(16) |
| C3'  | 0.049(2)    | 0.047(2)   | 0.060(2)   | -0.0006(18) | 0.0104(17) | -0.0071(17) |
| C4'  | 0.0402(19)  | 0.051(2)   | 0.068(3)   | -0.0054(18) | 0.0126(17) | -0.0044(16) |
| C5'  | 0.049(2)    | 0.067(3)   | 0.086(3)   | -0.006(2)   | 0.019(2)   | 0.003(2)    |
| C6'  | 0.045(2)    | 0.090(4)   | 0.147(5)   | -0.012(3)   | 0.030(3)   | -0.008(2)   |
| C7'  | 0.056(2)    | 0.042(2)   | 0.060(2)   | 0.0050(18)  | 0.0069(18) | -0.0067(19) |
| C8'  | 0.0383(18)  | 0.0365(19) | 0.059(2)   | 0.0055(16)  | 0.0037(16) | 0.0003(15)  |
| C9'  | 0.046(2)    | 0.040(2)   | 0.082(3)   | -0.0028(19) | 0.0153(19) | 0.0007(17)  |
| C10' | 0.065(3)    | 0.040(2)   | 0.093(3)   | 0.000(2)    | 0.014(2)   | -0.005(2)   |
| C11' | 0.057(2)    | 0.048(3)   | 0.094(3)   | 0.004(2)    | 0.019(2)   | -0.0118(19) |
| C12' | 0.044(2)    | 0.059(3)   | 0.077(3)   | 0.004(2)    | 0.018(2)   | -0.0043(18) |
| C13' | 0.046(2)    | 0.040(2)   | 0.067(2)   | -0.0010(18) | 0.0111(18) | 0.0030(17)  |

=====

The Temperature Factor has the Form of  $\text{Exp}(-T)$  Where  
 $T = 8 * (\text{Pi}^{**2}) * U * (\text{Sin}(\text{Theta}) / \text{Lambda})^{**2}$  for Isotropic Atoms  
 $T = 2 * (\text{Pi}^{**2}) * \text{Sum}_{ij} (h(i) * h(j) * U(i,j) * \text{Astar}(i) * \text{Astar}(j))$ , for  
Anisotropic Atoms. Astar(i) are Reciprocal Axial Lengths and  
h(i) are the Reflection Indices.

Table S5 - Bond Distances (Angstrom)  
for: Polymorph\_2 P 21/c R = 0.06

|     |      |           |      |       |           |
|-----|------|-----------|------|-------|-----------|
| S1  | -C1  | 1.714 (3) | N2'  | -C8'  | 1.383 (4) |
| S1  | -C4  | 1.727 (4) | N2'  | -C1'  | 1.360 (4) |
| S1' | -C4' | 1.743 (4) | C3   | -H3   | 0.9300    |
| S1' | -C1' | 1.714 (3) | N3'  | -C13' | 1.446 (4) |
| O1  | -C5  | 1.216 (5) | C6   | -H6C  | 0.9600    |
| O2  | -N3  | 1.226 (4) | C6   | -H6B  | 0.9600    |
| O3  | -N3  | 1.216 (5) | C6   | -H6A  | 0.9600    |
| N1  | -C7  | 1.131 (6) | C9   | -H9   | 0.9300    |
| N2  | -C8  | 1.383 (4) | C10  | -H10  | 0.9300    |
| N2  | -C1  | 1.358 (5) | C11  | -H11  | 0.9300    |
| N3  | -C13 | 1.447 (4) | C12  | -H12  | 0.9300    |
| C1  | -C2  | 1.387 (4) | C1'  | -C2'  | 1.378 (4) |
| O1' | -C5' | 1.214 (5) | C2'  | -C3'  | 1.406 (5) |
| C2  | -C7  | 1.424 (5) | C2'  | -C7'  | 1.422 (5) |
| N2  | -H2  | 0.83 (4)  | N2'  | -H2'  | 0.78 (4)  |
| C2  | -C3  | 1.410 (5) | C3'  | -C4'  | 1.347 (6) |
| O2' | -N3' | 1.235 (4) | C4'  | -C5'  | 1.461 (6) |
| C3  | -C4  | 1.345 (6) | C5'  | -C6'  | 1.510 (6) |
| O3' | -N3' | 1.217 (5) | C8'  | -C13' | 1.405 (5) |
| C4  | -C5  | 1.454 (5) | C8'  | -C9'  | 1.392 (4) |
| C5  | -C6  | 1.509 (6) | C9'  | -C10' | 1.370 (5) |
| C8  | -C9  | 1.396 (4) | C10' | -C11' | 1.376 (6) |
| C8  | -C13 | 1.408 (5) | C11' | -C12' | 1.352 (6) |
| C9  | -C10 | 1.373 (5) | C12' | -C13' | 1.383 (5) |
| C10 | -C11 | 1.374 (6) | C3'  | -H3'  | 0.9300    |
| C11 | -C12 | 1.356 (6) | C6'  | -H6A' | 0.9600    |
| C12 | -C13 | 1.388 (5) | C6'  | -H6B' | 0.9600    |
| N1' | -C7' | 1.137 (5) | C6'  | -H6C' | 0.9600    |

Table S5 - Bond Distances (Angstrom) (continued)  
for: Polymorph\_2 P 21/c R = 0.06

|      |       |        |      |       |        |
|------|-------|--------|------|-------|--------|
| C9'  | -H9'  | 0.9300 | C11' | -H11' | 0.9300 |
| C10' | -H10' | 0.9300 | C12' | -H12' | 0.9300 |

Table S6 - Bond Angles (Degrees)  
for: Polymorph\_2 P 21/c R = 0.06

|     |      |      |           |     |      |       |          |
|-----|------|------|-----------|-----|------|-------|----------|
| C1  | -S1  | -C4  | 91.39(18) | C11 | -C12 | -C13  | 120.2(4) |
| C1' | -S1' | -C4' | 91.08(17) | C8  | -C13 | -C12  | 121.5(3) |
| C1  | -N2  | -C8  | 132.5(3)  | N3  | -C13 | -C12  | 116.0(3) |
| O2  | -N3  | -C13 | 120.2(3)  | N3  | -C13 | -C8   | 122.5(3) |
| O3  | -N3  | -C13 | 118.9(3)  | C1' | -N2' | -C8'  | 132.3(3) |
| O2  | -N3  | -O3  | 120.9(3)  | C2  | -C3  | -H3   | 124.00   |
| S1  | -C1  | -N2  | 127.2(2)  | C4  | -C3  | -H3   | 124.00   |
| N2  | -C1  | -C2  | 121.9(3)  | O2' | -N3' | -C13' | 120.7(3) |
| S1  | -C1  | -C2  | 111.0(3)  | O3' | -N3' | -C13' | 118.3(3) |
| C1  | -C2  | -C3  | 112.6(3)  | O2' | -N3' | -O3'  | 121.0(4) |
| C3  | -C2  | -C7  | 124.8(3)  | H6B | -C6  | -H6C  | 110.00   |
| C1  | -N2  | -H2  | 118(3)    | C5  | -C6  | -H6B  | 109.00   |
| C8  | -N2  | -H2  | 110(3)    | H6A | -C6  | -H6C  | 110.00   |
| C1  | -C2  | -C7  | 122.6(3)  | C5  | -C6  | -H6A  | 109.00   |
| C2  | -C3  | -C4  | 112.7(3)  | C5  | -C6  | -H6C  | 109.00   |
| S1  | -C4  | -C3  | 112.3(3)  | H6A | -C6  | -H6B  | 109.00   |
| S1  | -C4  | -C5  | 118.2(3)  | C8  | -C9  | -H9   | 120.00   |
| C3  | -C4  | -C5  | 129.5(4)  | C10 | -C9  | -H9   | 120.00   |
| C4  | -C5  | -C6  | 117.7(4)  | C9  | -C10 | -H10  | 119.00   |
| O1  | -C5  | -C6  | 122.2(4)  | C11 | -C10 | -H10  | 119.00   |
| O1  | -C5  | -C4  | 120.1(4)  | C12 | -C11 | -H11  | 120.00   |
| N1  | -C7  | -C2  | 179.6(4)  | C10 | -C11 | -H11  | 120.00   |
| C9  | -C8  | -C13 | 116.5(3)  | C13 | -C12 | -H12  | 120.00   |
| N2  | -C8  | -C13 | 120.8(3)  | C11 | -C12 | -H12  | 120.00   |
| N2  | -C8  | -C9  | 122.7(3)  | S1' | -C1' | -N2'  | 127.2(2) |
| C8  | -C9  | -C10 | 120.9(3)  | S1' | -C1' | -C2'  | 111.3(2) |
| C9  | -C10 | -C11 | 121.4(4)  | N2' | -C1' | -C2'  | 121.6(3) |
| C10 | -C11 | -C12 | 119.5(4)  | C1' | -C2' | -C3'  | 113.1(3) |

Table S6 - Bond Angles (Degrees) (continued)  
 for: Polymorph\_2 P 21/c R = 0.06

|      |       |       |          |      |       |       |          |
|------|-------|-------|----------|------|-------|-------|----------|
| C1'  | -C2'  | -C7'  | 122.0(3) | C8'  | -C13' | -C12' | 121.3(3) |
| C3'  | -C2'  | -C7'  | 124.8(3) | N3'  | -C13' | -C8'  | 122.1(3) |
| C1'  | -N2'  | -H2'  | 114(3)   | N3'  | -C13' | -C12' | 116.6(3) |
| C8'  | -N2'  | -H2'  | 113(3)   | C2'  | -C3'  | -H3'  | 124.00   |
| C2'  | -C3'  | -C4'  | 112.7(3) | C4'  | -C3'  | -H3'  | 124.00   |
| S1'  | -C4'  | -C5'  | 117.1(3) | C5'  | -C6'  | -H6A' | 109.00   |
| S1'  | -C4'  | -C3'  | 111.8(3) | C5'  | -C6'  | -H6B' | 109.00   |
| C3'  | -C4'  | -C5'  | 131.0(4) | C5'  | -C6'  | -H6C' | 109.00   |
| C4'  | -C5'  | -C6'  | 116.6(4) | H6A' | -C6'  | -H6B' | 110.00   |
| O1'  | -C5'  | -C6'  | 122.6(4) | H6A' | -C6'  | -H6C' | 109.00   |
| O1'  | -C5'  | -C4'  | 120.8(4) | H6B' | -C6'  | -H6C' | 109.00   |
| N1'  | -C7'  | -C2'  | 177.0(4) | C8'  | -C9'  | -H9'  | 120.00   |
| C9'  | -C8'  | -C13' | 116.5(3) | C10' | -C9'  | -H9'  | 119.00   |
| N2'  | -C8'  | -C9'  | 122.3(3) | C9'  | -C10' | -H10' | 119.00   |
| N2'  | -C8'  | -C13' | 121.2(3) | C11' | -C10' | -H10' | 119.00   |
| C8'  | -C9'  | -C10' | 121.0(4) | C10' | -C11' | -H11' | 120.00   |
| C9'  | -C10' | -C11' | 121.4(4) | C12' | -C11' | -H11' | 120.00   |
| C10' | -C11' | -C12' | 119.1(4) | C11' | -C12' | -H12' | 120.00   |
| C11' | -C12' | -C13' | 120.7(4) | C13' | -C12' | -H12' | 120.00   |

Table S7 - Torsion Angles (Degrees)  
for: Polymorph\_2 P 21/c R = 0.06

|     |      |      |      |           |
|-----|------|------|------|-----------|
| C4  | -S1  | -C1  | -N2  | 178.3(3)  |
| C4  | -S1  | -C1  | -C2  | -0.8(3)   |
| C1  | -S1  | -C4  | -C3  | 0.5(3)    |
| C1  | -S1  | -C4  | -C5  | -178.8(3) |
| C4' | -S1' | -C1' | -N2' | -178.3(4) |
| C4' | -S1' | -C1' | -C2' | 0.0(3)    |
| C1' | -S1' | -C4' | -C3' | 0.2(3)    |
| C1' | -S1' | -C4' | -C5' | 177.2(3)  |
| C1  | -N2  | -C8  | -C13 | 174.4(4)  |
| C1  | -N2  | -C8  | -C9  | -5.6(6)   |
| C8  | -N2  | -C1  | -S1  | 10.0(6)   |
| C8  | -N2  | -C1  | -C2  | -171.1(4) |
| O2  | -N3  | -C13 | -C12 | -177.2(4) |
| O3  | -N3  | -C13 | -C8  | -178.0(4) |
| O3  | -N3  | -C13 | -C12 | 2.6(5)    |
| O2  | -N3  | -C13 | -C8  | 2.2(6)    |
| S1  | -C1  | -C2  | -C3  | 0.9(4)    |
| S1  | -C1  | -C2  | -C7  | -179.0(3) |
| N2  | -C1  | -C2  | -C3  | -178.2(3) |
| N2  | -C1  | -C2  | -C7  | 1.9(6)    |
| C7  | -C2  | -C3  | -C4  | 179.3(4)  |
| C1  | -C2  | -C3  | -C4  | -0.5(5)   |
| C2  | -C3  | -C4  | -S1  | 0.0(4)    |
| C2  | -C3  | -C4  | -C5  | 179.1(4)  |
| C3  | -C4  | -C5  | -C6  | -0.2(6)   |
| S1  | -C4  | -C5  | -O1  | -3.0(5)   |
| S1  | -C4  | -C5  | -C6  | 178.9(3)  |
| C3  | -C4  | -C5  | -O1  | 177.9(4)  |

Table S7 - Torsion Angles (Degrees) (continued)  
 for: Polymorph\_2 P 21/c R = 0.06

|     |      |       |       |           |
|-----|------|-------|-------|-----------|
| C13 | -C8  | -C9   | -C10  | 1.0(5)    |
| N2  | -C8  | -C13  | -N3   | 0.1(5)    |
| N2  | -C8  | -C13  | -C12  | 179.6(4)  |
| N2  | -C8  | -C9   | -C10  | -179.0(3) |
| C9  | -C8  | -C13  | -N3   | -179.9(3) |
| C9  | -C8  | -C13  | -C12  | -0.4(5)   |
| C8  | -C9  | -C10  | -C11  | -0.8(6)   |
| C9  | -C10 | -C11  | -C12  | -0.1(6)   |
| C10 | -C11 | -C12  | -C13  | 0.7(6)    |
| C11 | -C12 | -C13  | -N3   | 179.0(4)  |
| C11 | -C12 | -C13  | -C8   | -0.4(6)   |
| C8' | -N2' | -C1'  | -S1'  | 2.7(6)    |
| C8' | -N2' | -C1'  | -C2'  | -175.5(4) |
| C1' | -N2' | -C8'  | -C9'  | -15.4(6)  |
| C1' | -N2' | -C8'  | -C13' | 165.7(4)  |
| O2' | -N3' | -C13' | -C8'  | -0.3(6)   |
| O2' | -N3' | -C13' | -C12' | 179.3(4)  |
| O3' | -N3' | -C13' | -C8'  | -179.3(4) |
| O3' | -N3' | -C13' | -C12' | 0.4(6)    |
| S1' | -C1' | -C2'  | -C3'  | -0.2(4)   |
| S1' | -C1' | -C2'  | -C7'  | -178.8(3) |
| N2' | -C1' | -C2'  | -C3'  | 178.2(3)  |
| N2' | -C1' | -C2'  | -C7'  | -0.4(6)   |
| C1' | -C2' | -C3'  | -C4'  | 0.4(5)    |
| C7' | -C2' | -C3'  | -C4'  | 178.9(3)  |
| C2' | -C3' | -C4'  | -S1'  | -0.3(4)   |
| C2' | -C3' | -C4'  | -C5'  | -176.8(4) |
| S1' | -C4' | -C5'  | -O1'  | 4.3(5)    |

Table S7 - Torsion Angles (Degrees) (continued)  
for: Polymorph\_2 P 21/c R = 0.06

|      |       |       |       |           |
|------|-------|-------|-------|-----------|
| S1'  | -C4'  | -C5'  | -C6'  | -175.5(4) |
| C3'  | -C4'  | -C5'  | -O1'  | -179.4(4) |
| C3'  | -C4'  | -C5'  | -C6'  | 0.9(7)    |
| N2'  | -C8'  | -C9'  | -C10' | -178.8(4) |
| C13' | -C8'  | -C9'  | -C10' | 0.1(6)    |
| N2'  | -C8'  | -C13' | -N3'  | -1.3(6)   |
| N2'  | -C8'  | -C13' | -C12' | 179.1(4)  |
| C9'  | -C8'  | -C13' | -N3'  | 179.7(4)  |
| C9'  | -C8'  | -C13' | -C12' | 0.1(5)    |
| C8'  | -C9'  | -C10' | -C11' | -0.3(6)   |
| C9'  | -C10' | -C11' | -C12' | 0.2(7)    |
| C10' | -C11' | -C12' | -C13' | 0.1(6)    |
| C11' | -C12' | -C13' | -N3'  | -179.9(4) |
| C11' | -C12' | -C13' | -C8'  | -0.2(6)   |

Table S8 - Contact Distances (Angstrom)  
for: Polymorph\_2 P 21/c R = 0.06

|     |       |             |     |         |           |
|-----|-------|-------------|-----|---------|-----------|
| S1  | .O1   | 2.918 (3)   | O1  | .H9'    | 2.7300    |
| S1  | .C3   | 2.560 (4)   | N1  | .C5'_f  | 3.435 (7) |
| S1  | .C8   | 3.352 (4)   | O1  | .H6B    | 2.7800    |
| S1  | .C9   | 3.147 (4)   | O1  | .H6B_a  | 2.4800    |
| S1  | .C4_a | 3.550 (4)   | N1  | .C3'_e  | 3.448 (6) |
| S1  | .S1_a | 3.5851 (15) | O1  | .H6A    | 2.5600    |
| S1  | .S1_b | 3.5851 (15) | O1' | .H6A'   | 2.9100    |
| S1' | .C9'  | 3.153 (4)   | N1' | .C8'_l  | 3.405 (5) |
| S1' | .C3'  | 2.569 (4)   | O1' | .H9     | 2.6600    |
| S1' | .C8'  | 3.345 (4)   | O1' | .H10    | 2.7500    |
| S1' | .O1'  | 2.922 (3)   | O1' | .H6C'   | 2.5000    |
| S1  | .H9   | 2.4300      | O2  | .H11_c  | 2.5100    |
| S1' | .H9'  | 2.4600      | N2  | .C7     | 2.872 (5) |
| O1  | .C9'  | 3.356 (4)   | N2  | .N3     | 2.894 (5) |
| O1  | .S1   | 2.918 (3)   | N2  | .C10_b  | 3.401 (5) |
| O1  | .C6_a | 3.323 (6)   | N2  | .O2     | 2.588 (4) |
| O1  | .C10' | 3.375 (5)   | O2  | .H2     | 1.87 (4)  |
| O1' | .C9   | 3.295 (4)   | N2' | .C7'    | 2.844 (5) |
| O1' | .C10  | 3.340 (5)   | N2' | .N3'    | 2.891 (5) |
| O1' | .S1'  | 2.922 (3)   | O2' | .H2'    | 1.94 (4)  |
| O2  | .N2   | 2.588 (4)   | N2' | .O2'    | 2.591 (4) |
| O2  | .C8   | 2.823 (4)   | N2' | .C7'_m  | 3.440 (5) |
| O2' | .C8'  | 2.826 (4)   | O2' | .H11'_i | 2.5500    |
| O2' | .N2'  | 2.591 (4)   | O3  | .H11_c  | 2.8100    |
| O3  | .C12  | 2.650 (5)   | O3  | .H12    | 2.3300    |
| O3' | .C6_j | 3.411 (6)   | N3  | .C10_a  | 3.407 (5) |
| O3' | .C12' | 2.647 (6)   | O3  | .H10_c  | 2.8700    |
| O1  | .H10' | 2.7700      | N3  | .N2     | 2.894 (5) |

Table S8 - Contact Distances (Angstrom) (continued)  
 for: Polymorph\_2 P 21/c R = 0.06

|     |         |           |     |        |           |
|-----|---------|-----------|-----|--------|-----------|
| O3  | .H6C'_d | 2.6000    | C4  | .S1_b  | 3.550 (4) |
| N3' | .N2'    | 2.891 (5) | C4  | .C2    | 2.293 (5) |
| O3' | .H10'_i | 2.8600    | C4' | .C2'   | 2.292 (5) |
| O3' | .H6A_j  | 2.6300    | C5' | .N1_b  | 3.435 (7) |
| O3' | .H11'_i | 2.8300    | C5' | .C7_b  | 3.524 (6) |
| O3' | .H12'   | 2.3200    | C6  | .O1_b  | 3.323 (6) |
| N1  | .H3'_e  | 2.5300    | C6  | .O3'_g | 3.411 (6) |
| C1  | .C3     | 2.327 (5) | C6  | .C3    | 3.026 (6) |
| C1  | .C9     | 3.061 (4) | C6' | .C3'   | 3.040 (6) |
| C1  | .C9_b   | 3.485 (5) | C7  | .C5'_f | 3.524 (6) |
| C1' | .C7'_m  | 3.529 (5) | C7  | .N2    | 2.872 (5) |
| C1' | .C9'    | 3.062 (4) | C7' | .N2'   | 2.844 (5) |
| N1' | .H3_k   | 2.5500    | C7' | .C2'_m | 3.499 (5) |
| C1' | .C3'    | 2.323 (5) | C7' | .C1'_1 | 3.529 (5) |
| N2  | .H9     | 2.6300    | C7' | .N2'_1 | 3.440 (5) |
| C2  | .C4     | 2.293 (5) | C8  | .C11   | 2.806 (5) |
| C2' | .C7'_1  | 3.499 (5) | C8  | .S1    | 3.352 (4) |
| C2' | .C4'    | 2.292 (5) | C8  | .O2    | 2.823 (4) |
| N2' | .H9'    | 2.6100    | C8  | .C11_b | 3.566 (5) |
| C3  | .C6     | 3.026 (6) | C8  | .C9_a  | 3.460 (5) |
| C3  | .S1     | 2.560 (4) | C8' | .C11'  | 2.804 (5) |
| N3  | .H12    | 2.5400    | C8' | .O2'   | 2.826 (4) |
| N3  | .H2     | 2.44 (4)  | C8' | .S1'   | 3.345 (4) |
| C3' | .N1_k   | 3.448 (6) | C8' | .N1'_m | 3.405 (5) |
| N3' | .H12'   | 2.5400    | C9  | .C12   | 2.757 (5) |
| C3' | .S1'    | 2.569 (4) | C9  | .O1'   | 3.295 (4) |
| N3' | .H2'    | 2.50 (4)  | C9  | .S1    | 3.147 (4) |
| C3' | .C6'    | 3.040 (6) | C9  | .C1_a  | 3.485 (5) |

Table S8 - Contact Distances (Angstrom) (continued)  
 for: Polymorph\_2 P 21/c R = 0.06

|      |         |           |      |         |           |
|------|---------|-----------|------|---------|-----------|
| C9   | .C1     | 3.061 (4) | C12' | .C10'_n | 3.549 (6) |
| C9   | .C13_b  | 3.421 (5) | C12' | .O3'    | 2.647 (6) |
| C9   | .C8_b   | 3.460 (5) | C13  | .C12_b  | 3.450 (6) |
| C9'  | .C12'   | 2.746 (5) | C13  | .C10    | 2.731 (5) |
| C9'  | .C1'    | 3.062 (4) | C13  | .C10_a  | 3.516 (5) |
| C9'  | .S1'    | 3.153 (4) | C13  | .C9_a   | 3.421 (5) |
| C9'  | .O1     | 3.356 (4) | C13  | .C11_b  | 3.454 (6) |
| C10  | .N2_a   | 3.401 (5) | C13' | .C10'   | 2.726 (5) |
| C10  | .C13_b  | 3.516 (5) | C13' | .C11'_n | 3.567 (6) |
| C10  | .N3_b   | 3.407 (5) | C1   | .H9     | 2.8100    |
| C10  | .C13    | 2.731 (5) | C1'  | .H9'    | 2.8100    |
| C10  | .O1'    | 3.340 (5) | C2   | .H2     | 2.52 (4)  |
| C10' | .C12'_n | 3.549 (6) | C2'  | .H2'    | 2.44 (4)  |
| C10' | .C13'   | 2.726 (5) | C3   | .H6C    | 2.6400    |
| C10' | .O1     | 3.375 (5) | C3'  | .H6B'   | 2.8000    |
| C11  | .C8_a   | 3.566 (5) | C4   | .H6C    | 2.5700    |
| C11  | .C8     | 2.806 (5) | C4   | .H6B    | 3.0000    |
| C11  | .C13_a  | 3.454 (6) | C4'  | .H6A'   | 2.8500    |
| C11' | .C8'    | 2.804 (5) | C4'  | .H6B'   | 2.6400    |
| C11' | .C12'_n | 3.538 (6) | C5   | .H3     | 2.8100    |
| C11' | .C13'_n | 3.567 (6) | C5'  | .H3'    | 2.8400    |
| C12  | .C12_a  | 3.568 (6) | C6   | .H3     | 2.8100    |
| C12  | .C12_b  | 3.568 (6) | C6'  | .H3'    | 2.8300    |
| C12  | .C13_a  | 3.450 (6) | C7   | .H2     | 2.55 (4)  |
| C12  | .C9     | 2.757 (5) | C7   | .H3     | 2.7600    |
| C12  | .O3     | 2.650 (5) | C7'  | .H3'    | 2.7600    |
| C12' | .C9'    | 2.746 (5) | C7'  | .H2'    | 2.49 (4)  |
| C12' | .C11'_n | 3.538 (6) | C9'  | .H2'    | 3.08 (4)  |

Table S8 - Contact Distances (Angstrom) (continued)  
 for: Polymorph\_2 P 21/c R = 0.06

|      |        |          |      |        |        |
|------|--------|----------|------|--------|--------|
| C13  | .H2    | 2.42 (4) | H6C' | .O1'   | 2.5000 |
| C13' | .H2'   | 2.46 (4) | H6C' | .H10   | 2.5000 |
| H6A' | .C4'   | 2.8500   | H6C' | .O3_h  | 2.6000 |
| H6A' | .O1'   | 2.9100   | H6A  | .O3'_g | 2.6300 |
| H2   | .O2    | 1.87 (4) | H6A  | .O1    | 2.5600 |
| H2   | .N3    | 2.44 (4) | H6B  | .O1    | 2.7800 |
| H2   | .C2    | 2.52 (4) | H6B  | .C4    | 3.0000 |
| H2   | .C7    | 2.55 (4) | H6B  | .O1_b  | 2.4800 |
| H2   | .C13   | 2.42 (4) | H6C  | .C3    | 2.6400 |
| H2'  | .N3'   | 2.50 (4) | H6C  | .H3    | 2.1900 |
| H2'  | .C2'   | 2.44 (4) | H6C  | .C4    | 2.5700 |
| H2'  | .O2'   | 1.94 (4) | H9   | .S1    | 2.4300 |
| H2'  | .C9'   | 3.08 (4) | H9   | .O1'   | 2.6600 |
| H2'  | .C13'  | 2.46 (4) | H9   | .H10   | 2.2900 |
| H2'  | .C7'   | 2.49 (4) | H9   | .N2    | 2.6300 |
| H6B' | .C4'   | 2.6400   | H9   | .C1    | 2.8100 |
| H6B' | .H3'   | 2.4000   | H9'  | .S1'   | 2.4600 |
| H6B' | .C3'   | 2.8000   | H9'  | .O1    | 2.7300 |
| H3   | .C6    | 2.8100   | H9'  | .N2'   | 2.6100 |
| H3   | .H6C   | 2.1900   | H9'  | .C1'   | 2.8100 |
| H3   | .C5    | 2.8100   | H9'  | .H10'  | 2.2800 |
| H3   | .C7    | 2.7600   | H10  | .O1'   | 2.7500 |
| H3   | .N1'_e | 2.5500   | H10  | .H9    | 2.2900 |
| H3'  | .C7'   | 2.7600   | H10  | .H11   | 2.3000 |
| H3'  | .N1_k  | 2.5300   | H10  | .H6C'  | 2.5000 |
| H3'  | .C5'   | 2.8400   | H10  | .O3_h  | 2.8700 |
| H3'  | .C6'   | 2.8300   | H10' | .H9'   | 2.2800 |
| H3'  | .H6B'  | 2.4000   | H10' | .H11'  | 2.3000 |

Table S8 - Contact Distances (Angstrom) (continued)  
for: Polymorph\_2 P 21/c R = 0.06

|      |        |        |      |        |        |
|------|--------|--------|------|--------|--------|
| H10' | .O1    | 2.7700 | H11' | .O2'_g | 2.5500 |
| H10' | .O3'_g | 2.8600 | H11' | .O3'_g | 2.8300 |
| H11  | .H10   | 2.3000 | H12  | .H11   | 2.2900 |
| H11  | .H12   | 2.2900 | H12  | .O3    | 2.3300 |
| H11  | .O3_h  | 2.8100 | H12  | .N3    | 2.5400 |
| H11  | .O2_h  | 2.5100 | H12' | .O3'   | 2.3200 |
| H11' | .H12'  | 2.2800 | H12' | .N3'   | 2.5400 |
| H11' | .H10'  | 2.3000 | H12' | .H11'  | 2.2800 |

Table S9 - Hydrogen Bonds (Angstrom, Deg)  
for: Polymorph\_2 P 21/c R = 0.06

|      |    |      |    |     |         |         |          |        |       |
|------|----|------|----|-----|---------|---------|----------|--------|-------|
| N2   | -- | H2   | .. | O2  | 0.83(4) | 1.87(4) | 2.588(4) | 145(4) | .     |
| N2   | -- | H2   | .. | N3  | 0.83(4) | 2.44(4) | 2.894(5) | 116(3) | .     |
| N2'  | -- | H2'  | .. | O2' | 0.78(4) | 1.94(4) | 2.591(4) | 142(4) | .     |
| N2'  | -- | H2'  | .. | N3' | 0.78(4) | 2.50(4) | 2.891(5) | 113(3) | .     |
| C3   | -- | H3   | .. | N1' | 0.9300  | 2.5500  | 3.461(5) | 165.00 | 1_545 |
| C3'  | -- | H3'  | .. | N1  | 0.9300  | 2.5300  | 3.448(6) | 169.00 | 1_565 |
| C6   | -- | H6B  | .. | O1  | 0.9600  | 2.4800  | 3.323(6) | 146.00 | 4_555 |
| C9   | -- | H9   | .. | S1  | 0.9300  | 2.4300  | 3.147(4) | 134.00 | .     |
| C9'  | -- | H9'  | .. | S1' | 0.9300  | 2.4600  | 3.153(4) | 132.00 | .     |
| C11  | -- | H11  | .. | O2  | 0.9300  | 2.5100  | 3.426(5) | 170.00 | 2_655 |
| C11' | -- | H11' | .. | O2' | 0.9300  | 2.5500  | 3.467(5) | 170.00 | 2_546 |
| C12  | -- | H12  | .. | O3  | 0.9300  | 2.3300  | 2.650(5) | 100.00 | .     |
| C12' | -- | H12' | .. | O3' | 0.9300  | 2.3200  | 2.647(6) | 100.00 | .     |

Translation of Symmetry Code to Equiv.Pos

a =[ 4554.00] = [ 4\_565] = x,1/2-y,-1/2+z  
b =[ 4555.00] = [ 4\_566] = x,1/2-y,1/2+z  
c =[ 2645.00] = [ 2\_645] = 1-x,-1/2+y,1/2-z  
d =[ 2645.00] = [ 2\_645] = 1-x,-1/2+y,1/2-z  
e =[ 1545.00] = [ 1\_545] = x,-1+y,z  
f =[ 4554.00] = [ 4\_565] = x,1/2-y,-1/2+z  
g =[ 2546.00] = [ 2\_546] = -x,-1/2+y,3/2-z  
h =[ 2655.00] = [ 2\_655] = 1-x,1/2+y,1/2-z  
i =[ 2556.00] = [ 2\_556] = -x,1/2+y,3/2-z  
j =[ 2556.00] = [ 2\_556] = -x,1/2+y,3/2-z  
k =[ 1565.00] = [ 1\_565] = x,1+y,z  
l =[ 4564.00] = [ 4\_575] = x,3/2-y,-1/2+z  
m =[ 4565.00] = [ 4\_576] = x,3/2-y,1/2+z  
n =[ 3566.00] = [ 3\_566] = -x,1-y,1-z
